# Supplementary material
Source: HighWire-hosted journal article supplement (https://bmjopenquality.bmj.com/highwire/filestream/143197/field_highwire_adjunct_files/3/bmjoq-2021-001617supp004_data_supplement.pdf)
Supplement: bmjoq-2021-001617supp004_data_supplement.pdf [file bmjoq-2021-001617supp004_data_supplement.pdf]

### Process Boundaries

| From    | Check in                 | Process: COVID-19 Vaccinaptn |       |       |       | Available Time |       | 10 h  | Date | 4/12/21 |
|---------|--------------------------|------------------------------|-------|-------|-------|----------------|-------|-------|------|---------|
| To      | Vaccination              | Cycles 6                     |       |       |       | Demand         |       | 250   | Time | 10:00   |
| Locatio | Station 8                | People volunteers            |       |       |       | Takt Time      |       | 144s  |      |         |
| Step #  | Operation Description    | 1                            | 2     | 3     | 4     | 5              | 6     | Mean  |      |         |
| 1       | Laminated card           | 56.0                         | 37.0  | 40.4  | 21.5  | 32.9           | 38.0  | 37.6  |      |         |
|         | Walk to Online checkin   | 2.0                          | 2.0   | 3.0   | 2.0   | 3.0            | 3.0   | 2.5   |      |         |
| 2       | Online checkin & consent | 84.0                         | 75.5  | 65.0  | 53.5  | 111.4          | 43.4  | 72.1  |      |         |
|         | Walk to Chair            | 3.0                          | 3.0   | 3.0   | 4.0   | 2.0            | 3.0   | 3.0   |      |         |
| 3       | Consent fill out         | 185.7                        | 42.3  | 42.8  | 130.5 | 45.3           | 234.2 | 113.5 |      |         |
| 4       | Verify Consent           | 150.3                        | 63.8  | 81.2  | 56.8  | 149.7          | 160.2 | 110.3 |      |         |
|         | Walk to Vaccination      | 3.0                          | 2.0   | 3.0   | 2.0   | 3.0            | 2.0   | 2.5   |      |         |
| 5       | Vaccination              | 104.3                        | 72.8  | 74.7  | 98.6  | 88.4           | 138.4 | 96.2  |      |         |
|         |                          |                              |       |       |       |                |       |       |      |         |
|         | Time for one observation | 588.3                        | 298.4 | 313.1 | 368.9 | 435.7          | 622.2 | 429.8 |      |         |
|         | Minus walk or wait time  | 8.0                          | 7.0   | 9.0   | 8.0   | 8.0            | 8.0   | 8.0   |      |         |
|         | Equals Process Time      | 580.3                        | 291.4 | 304.1 | 360.9 | 427.7          | 614.2 | 421.8 |      |         |
|         |                          |                              |       |       |       |                |       |       |      |         |
